# Supplementary material for: Selective removal of metal impurities from single walled carbon nanotube samples
Source: Royal Society of Chemistry journal article supplement (doi:10.1039/c2nj41057e), 2013-01-01
Supplement: c2nj41057e.pdf [file c2nj41057e.pdf]

### Supplementary Information

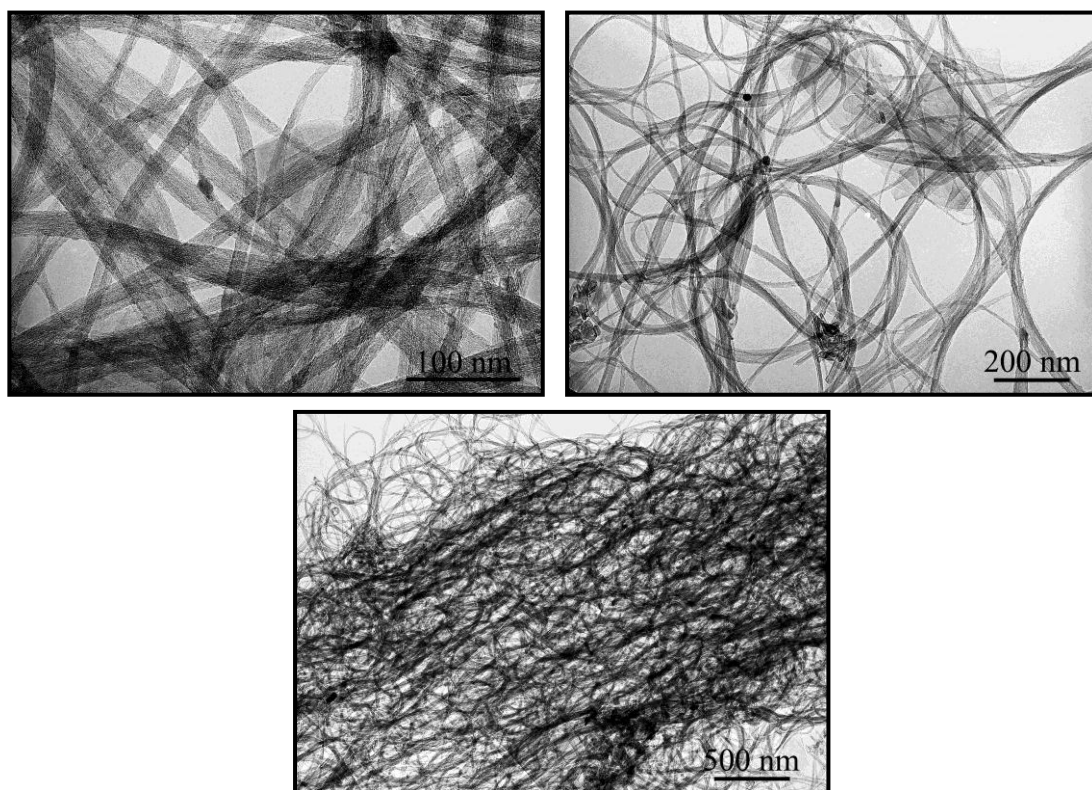

Figure S1. TEM images after the purification process with addition of oxygen in  $\text{Cl}_2/\text{N}_2$  mixture applied on AD-SWNT; duration: 2 hours at  $1100^\circ\text{C}$ .

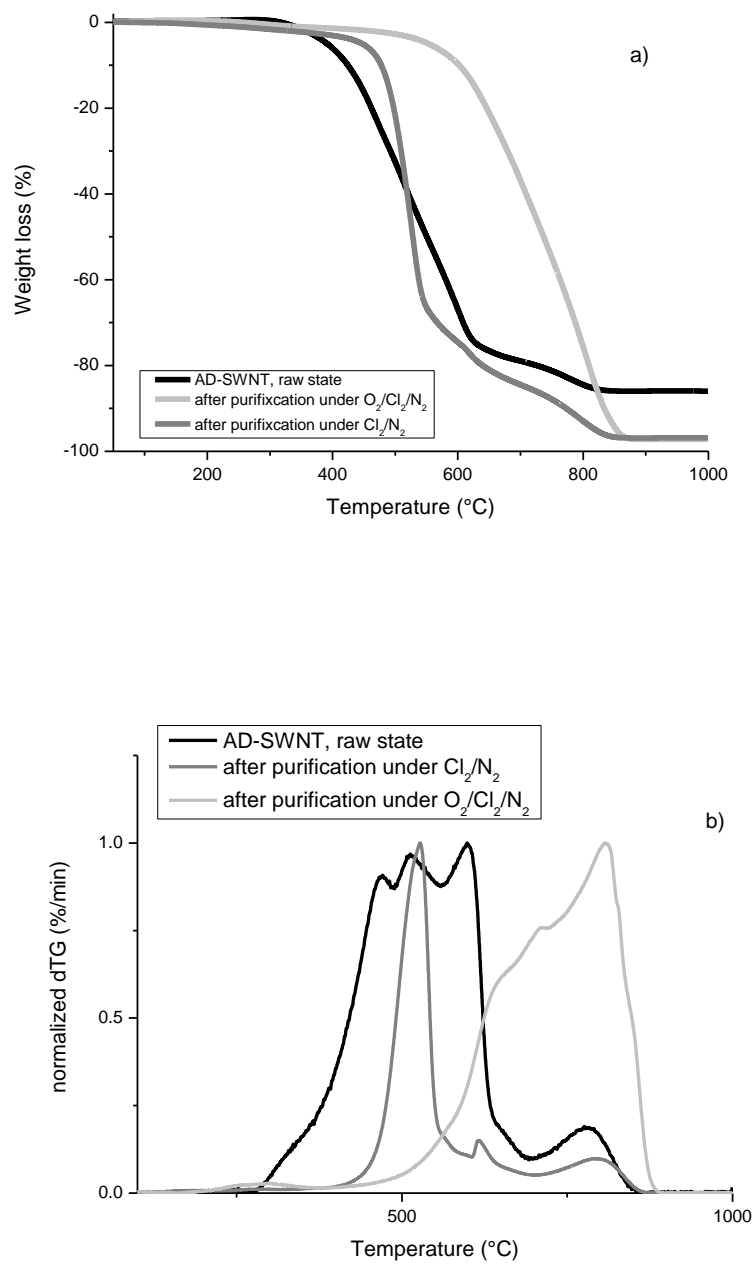

Figure S2. TGA (a) and dTG (b) profiles for AD-SWNT before and after purification under chlorine without and with oxygen; duration: 2 hours at 1100°C.
